# Supplementary material for: Combined multidimensional single-cell protein and RNA profiling dissects the cellular and functional heterogeneity of thymic epithelial cells
Source: Nat Commun. 2023 Jul 10;14:4071. doi: 10.1038/s41467-023-39722-9 (PMC10333192; doi:10.1038/s41467-023-39722-9)
Supplement: Supplementary file 1 — Supplementary Information [file 41467_2023_39722_MOESM1_ESM.pdf]

## Supplementary Figure 1

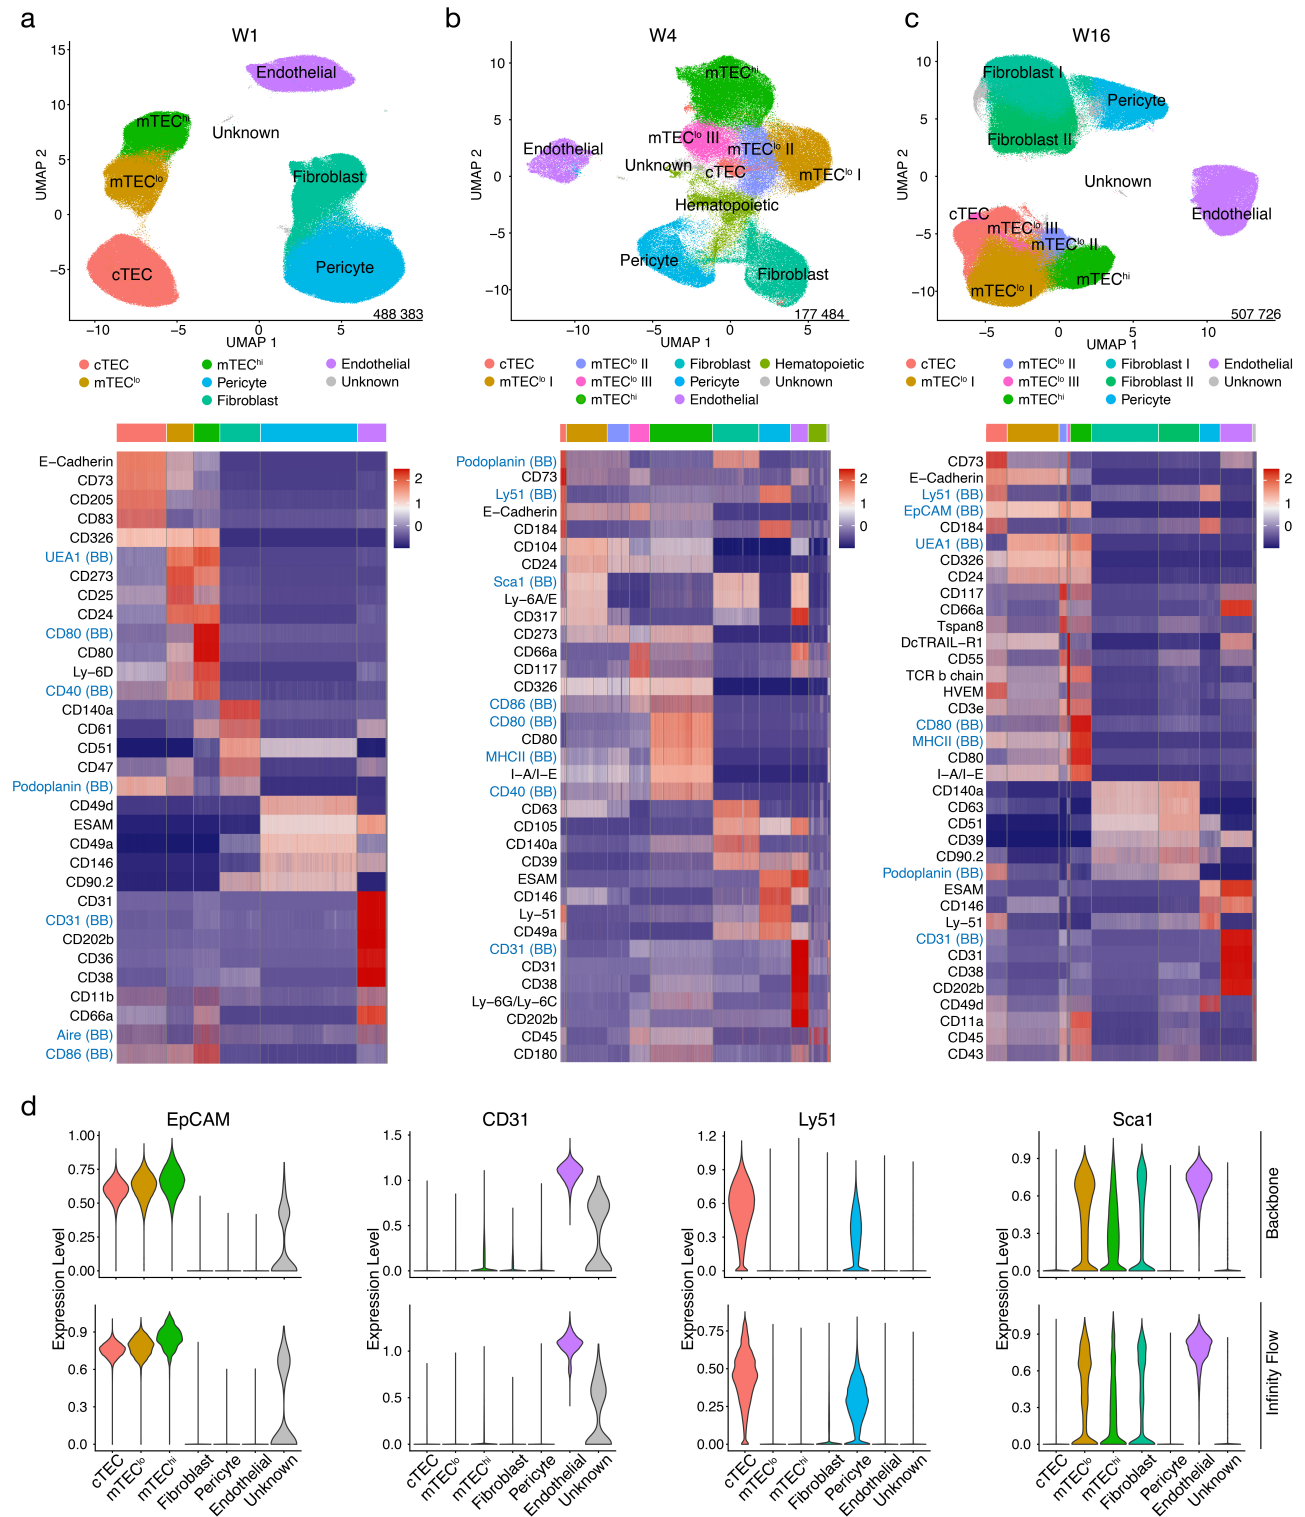

### Supplementary Figure 1 | Infinity Flow analysis on thymic stromal cells

(a-c) Infinity Flow analysis was used to impute the expression of surface markers on CD45<sup>+</sup> cells derived from thymi of (a) 1- (n = 23), (b) 4- (n = 7), and (c) 16-week-old (n = 12) C57BL/6 WT mice, respectively. Hierarchical clustering analysis was performed on (a) 488383, (b) 177484, and (c) 507726 CD45<sup>+</sup> cells, respectively, and projected in a 2-dimensional space using UMAP (top panels; 7 to 10 clusters were obtained per timepoint). Each colour represents a specific cluster as indicated. Heatmaps (bottom panels) display the expression of the top 7 markers upregulated in each cluster (log fold-change > 0.2). Backbone (BB) markers have a blue font. (d) Violin plots comparing the expression of the indicated markers based on the backbone staining (top panels) and the prediction of Infinity Flow based on exploratory measurements of the same proteins (bottom panels).

## Supplementary Figure 2

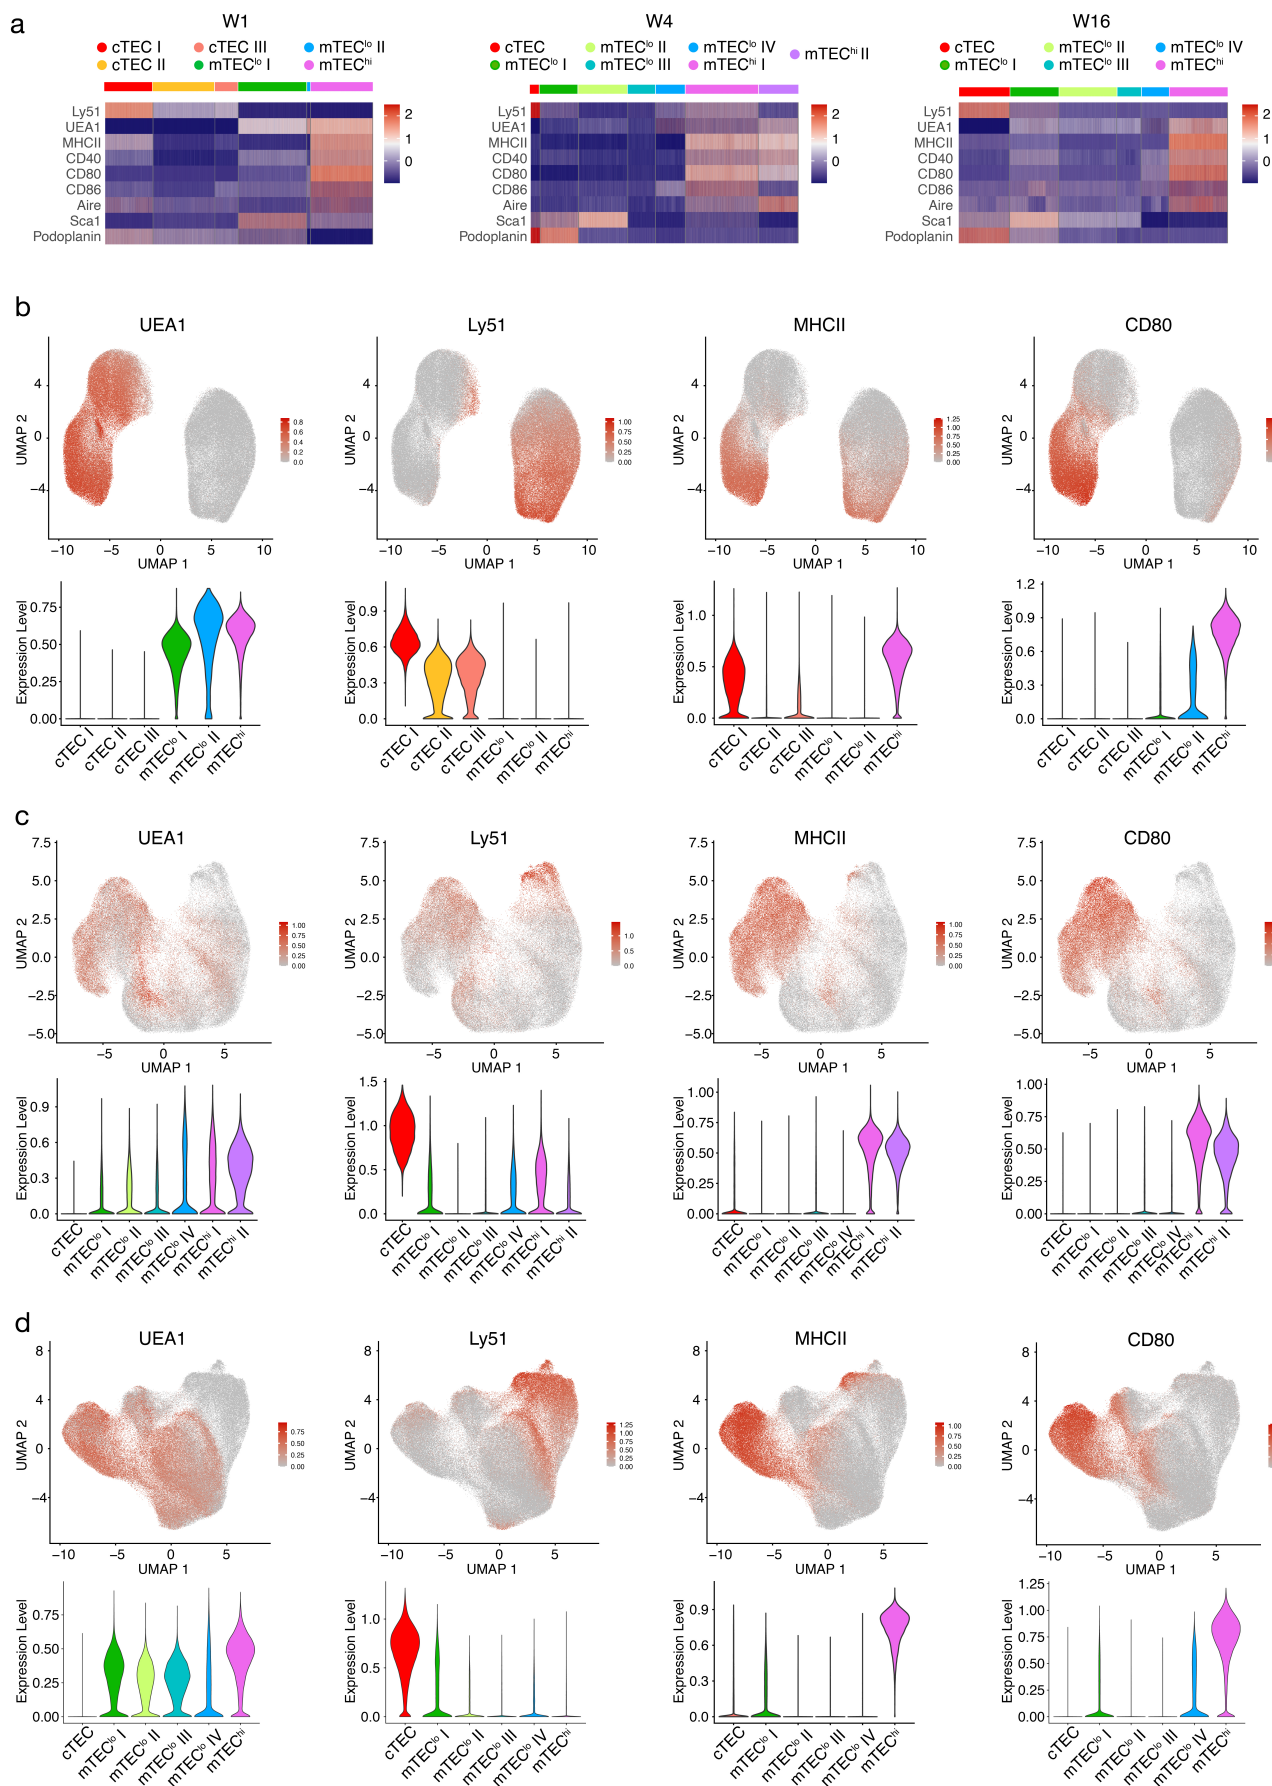

**Supplementary Figure 2 | Classification of clusters based on UEA1, Ly51, MHCII, and CD80 expression**

**(a)** Infinity Flow analysis was used to impute the expression of surface markers on TEC (CD45<sup>+</sup>EpCAM1<sup>+</sup>) derived from thymi of (b) 1- (n = 23), (c) 4- (n = 7), and (d) 16-week-old (n = 12) mice. Heatmaps display the expression of the backbone markers used for the LEGENDScreen. **(b-d)** UMAP graphs (top panels) and violin plots (bottom panels) illustrating the expression of UEA1, Ly51, MHCII, and CD80 on TEC from (a) 1-, (b) 4-, and (c) 16-week-old mice. Colour gradient indicates expression levels in the UMAP graphs and colours in the violin plots represent the different clusters, as defined in Figure 1b.

## Supplementary Figure 3

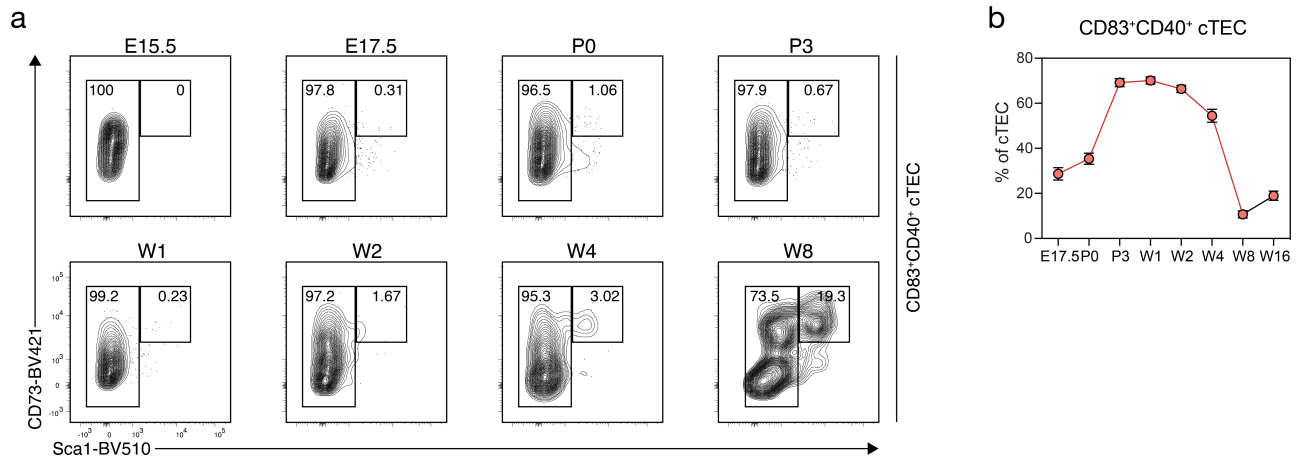

### Supplementary Figure 3 | Characterization of perinatal cTEC

**(a)** Appearance of a CD73 and Sca1 double positive population within perinatal cTEC was analysed at the indicated timepoints in C57BL/6 WT mice. Shown are representative FACS plots. **(b)** Abundance of a CD83 and CD40 double positive population (hereafter perinatal cTEC) within cTEC was analysed at the indicated timepoints in C57BL/6 WT mice. Shown are cumulative data depicting the percent of perinatal cTEC within cTEC (E15.5  $n = 13$ , E17.5  $n = 7$ , P0  $n = 6$ , P3  $n = 8$ , W1  $n = 4$ , W2  $n = 7$ , W4  $n = 5$ , W8  $n = 5$ , W16  $n = 8$ , from 2-3 independent experiments per timepoint). Data are presented as mean values  $\pm$  SEM. Source data are provided as a Source Data file.

## Supplementary Figure 4

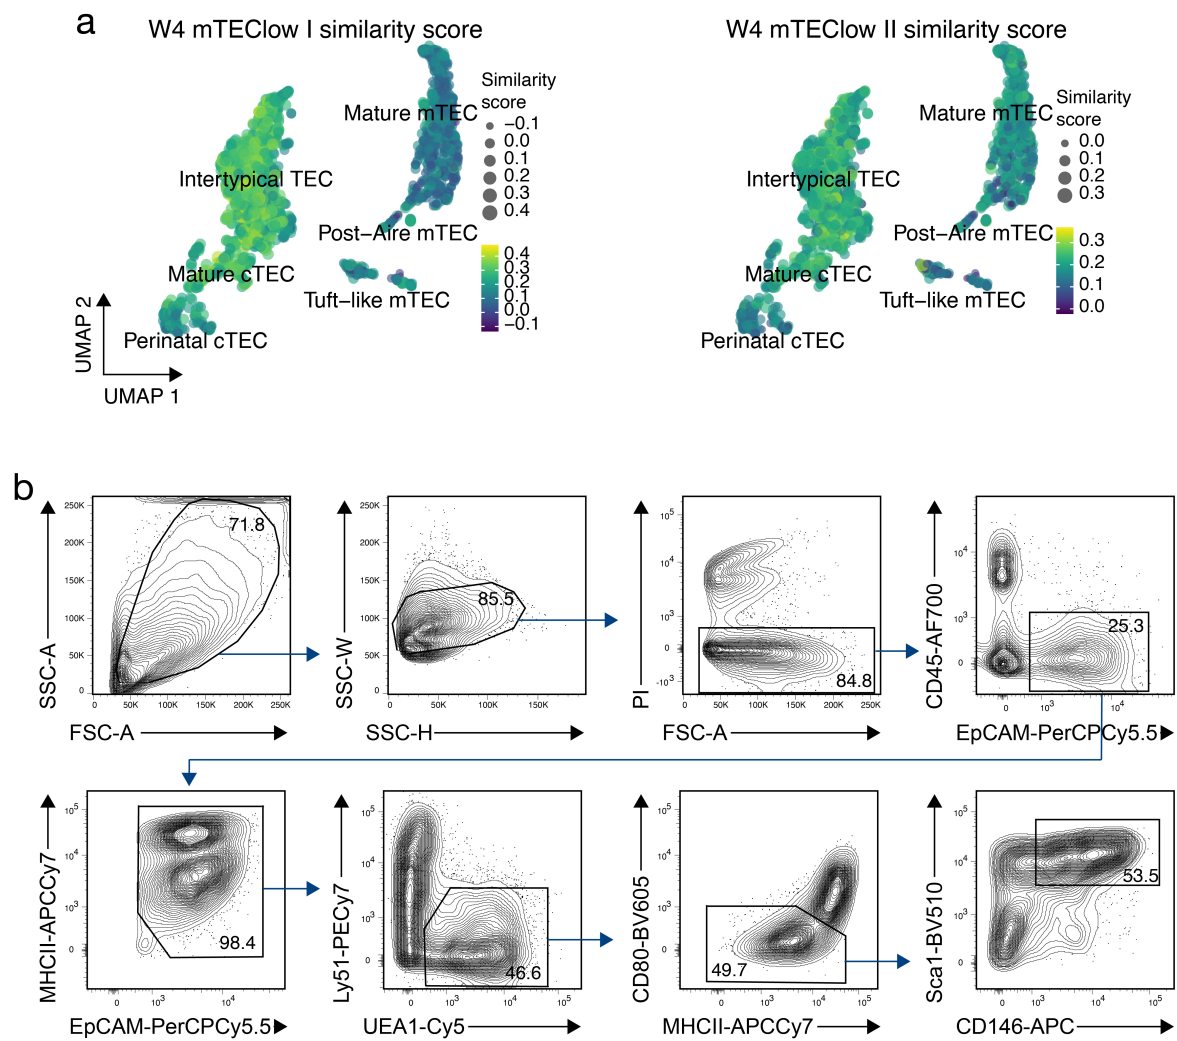

### Supplementary Figure 4 | Dissecting mTEC<sup>lo</sup> heterogeneity

**(a)** UMAP graph illustrating the similarity score of the mTEC<sup>lo</sup> I and II clusters from the 4-week Infinity Flow datasets to each cell of the scRNAseq reference dataset, based on the surface protein expression levels imputed by Infinity Flow.

**(b)** Shown are representative FACS plots illustrating the gating strategy to identify Sca1<sup>+</sup>CD146<sup>+</sup> cells within mTEC<sup>lo</sup>. Data are derived from a 16-week-old C57BL/6 WT mouse.

## Supplementary Figure 5

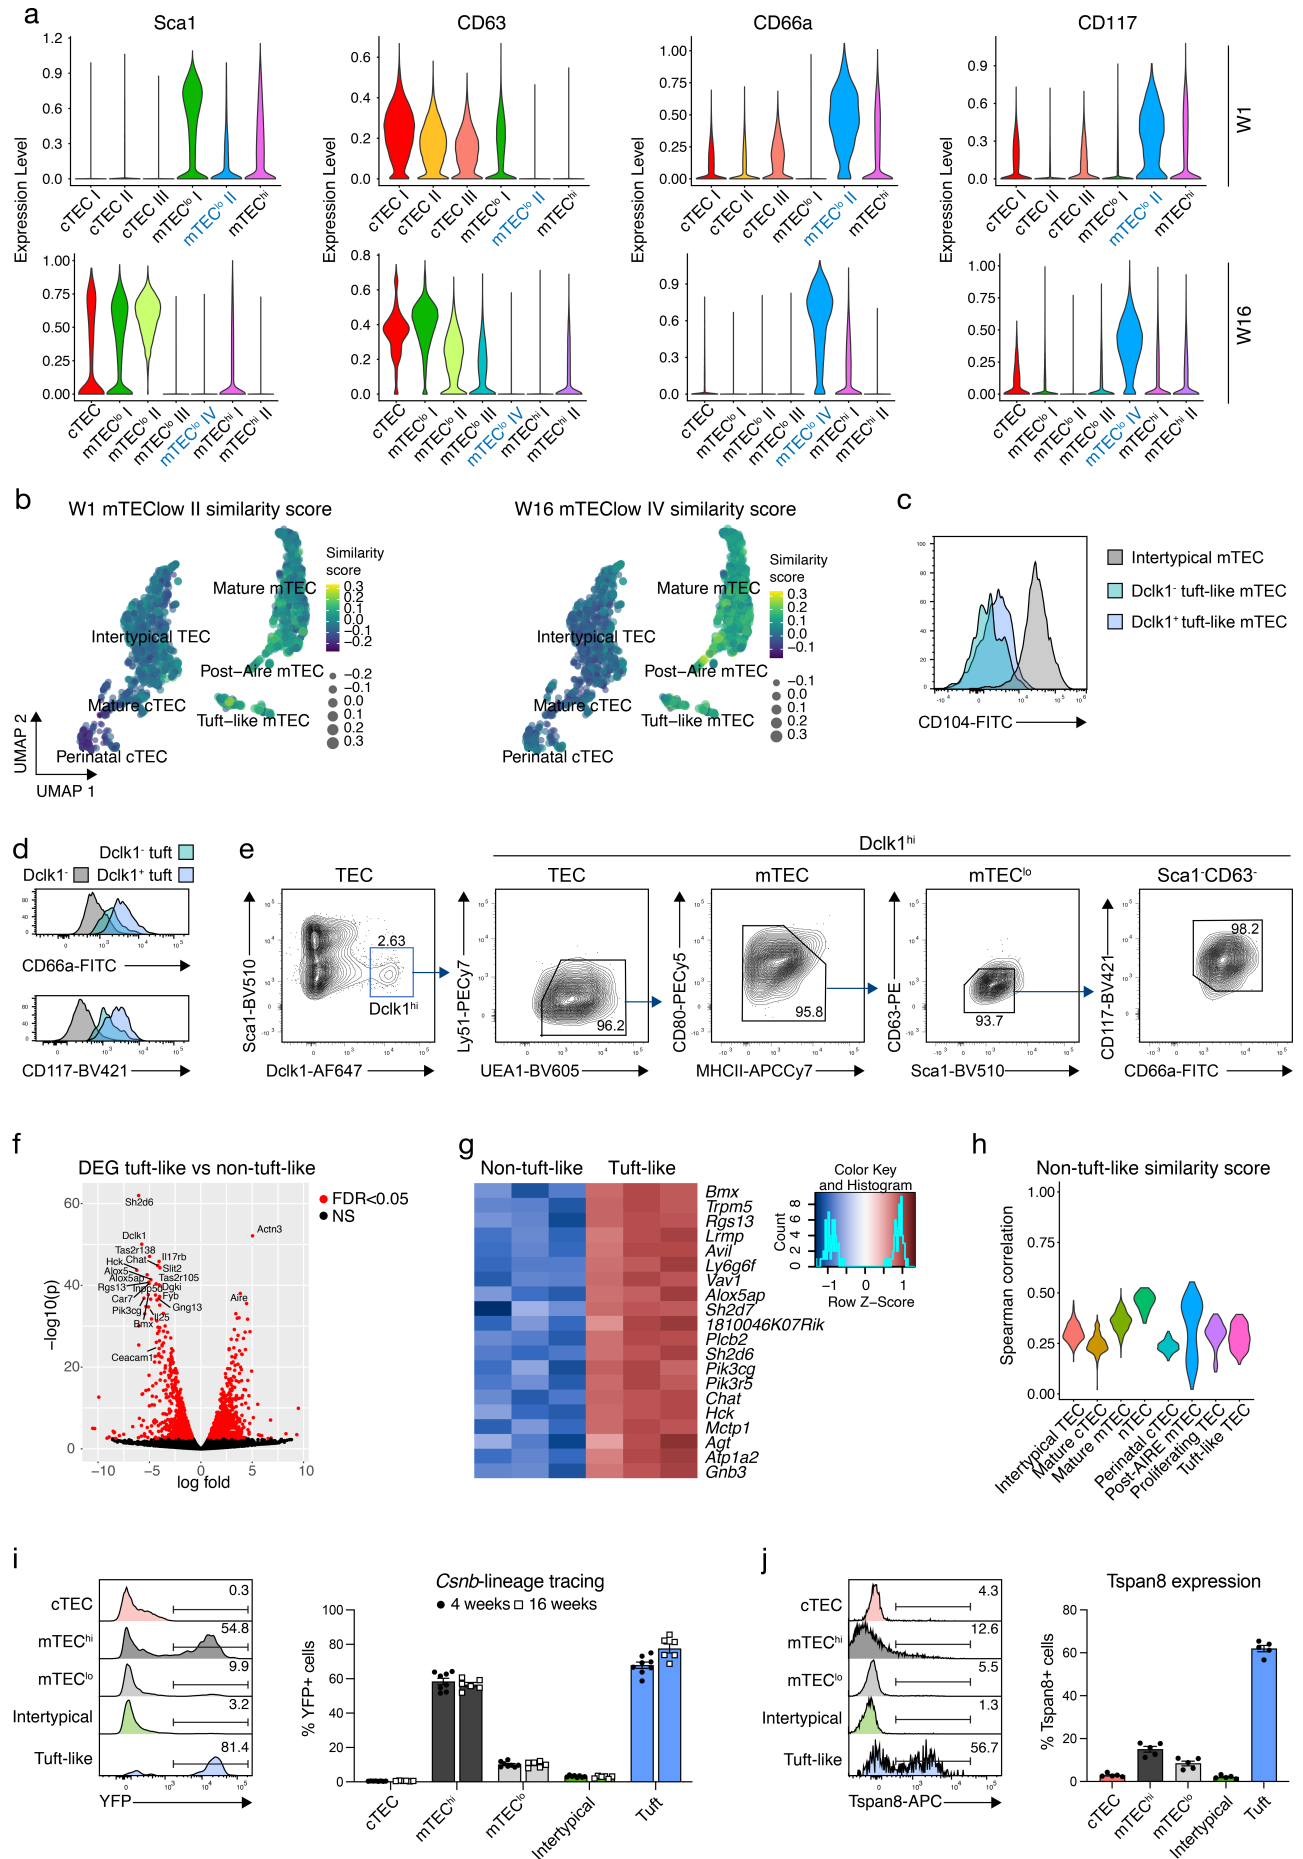

### Supplementary Figure 5 | Pre-mature and post-Aire mTEC compartments

(a) Violin plots illustrating the expression of Sca1, CD63, CD66a, and CD117 on TEC from 1- and 4-week-old mice. Colours represent the different clusters, as defined in Figure 1b. (b) UMAP graph illustrating the similarity score of the mTEC<sup>lo</sup> II cluster from the 1- (left panel) and the mTEC<sup>lo</sup> IV cluster from the 4-week (right panel) Infinity Flow datasets to each cell of the scRNAseq reference dataset, based on the surface protein expression levels imputed by Infinity Flow. (c) Histogram showing the expression of CD104 in Dclk1 negative and positive tuft-like compared to intertypical mTEC. (d) Histograms illustrating the expression levels of CD66a and CD117 within Dclk1<sup>-</sup> TEC, Dclk1<sup>-</sup> tuft-like mTEC and Dclk1<sup>+</sup> tuft-like mTEC. (e) FACS plots illustrating the percent of Dclk1<sup>+</sup> TEC (first graph gated on PI<sup>-</sup>CD45<sup>-</sup>EpCAM1<sup>+</sup> cells) falling within the new tuft-like mTEC gating strategy, as defined in Figure 5d. (f-h) Triplicates of Sca1<sup>-</sup>CD63<sup>-</sup>CD66a<sup>+</sup>CD117<sup>+</sup> tuft-like and Sca1<sup>-</sup>CD63<sup>-</sup>CD66a<sup>-</sup>CD117<sup>-</sup> non-tuft-like mTEC isolated from 6-week-old WT mice were used for bulk RNAseq as described in the methods. In (f) a volcano plot depicts the differentially expressed genes between non-tuft and tuft samples. Differential gene expression analysis was conducted using the two-sided likelihood ratio test in edgeR with Benjamini-Hochberg correction for multiple hypothesis testing. In (g) a heatmap shows the expression levels of the top 20 genes associated with a tuft-like mTEC signature<sup>1</sup> across the samples. In (h) a violin plot depicts the Spearman correlation of the non-tuft gene signature with the previously defined TEC subpopulations from a reference scRNAseq dataset<sup>1</sup>. (i) *Csnb*<sup>Cre::Rosa26<sup>LSL-YFP</sup></sup> mice were analysed for the abundance of YFP<sup>+</sup> cells within cTEC, mTEC<sup>hi</sup>, mTEC<sup>lo</sup>, intertypical TEC and tuft-like mTEC at 4 and 16 weeks after birth. Shown are representative histograms and cumulative data (4 weeks n = 8, 16 weeks n = 6, from two independent experiments per timepoint). Data are presented as mean values  $\pm$  SEM. Source data are provided as a Source Data file. (j) C57BL/6 WT mice were analysed for the abundance of Tspan8<sup>+</sup> cells within cTEC, mTEC<sup>hi</sup>, mTEC<sup>lo</sup>, intertypical TEC and tuft-like mTEC. Shown are representative histograms and cumulative data (n = 5, from two independent experiments). Data are presented as mean values  $\pm$  SEM. Source data are provided as a Source Data file.

## Supplementary Figure 6

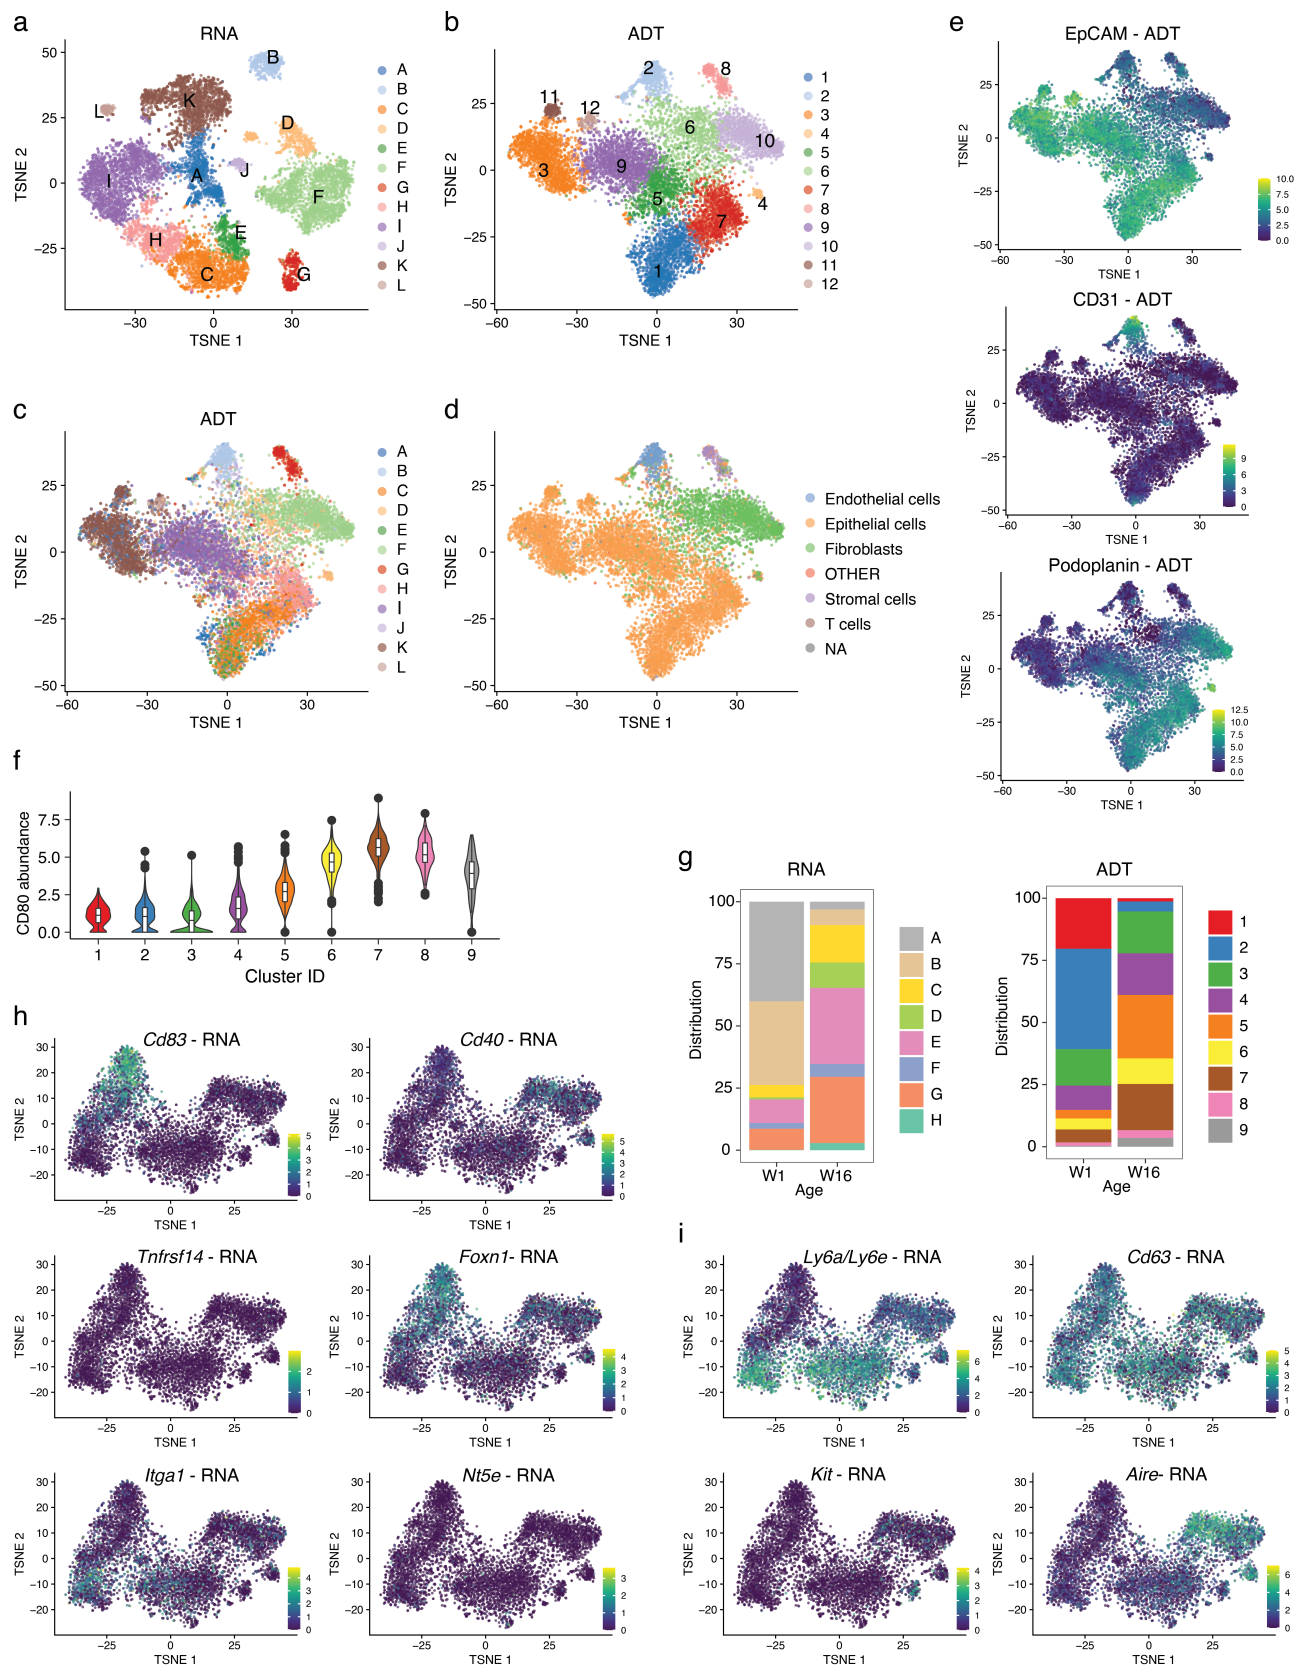

### Supplementary Figure 6 | CITEseq analysis on thymic stromal cells

CD45<sup>+</sup> Ter119<sup>-</sup> thymic stromal cells isolated from 1- and 16-week-old C57BL/6 WT mice were used for scRNAseq in combination with CITEseq as described in the methods. **(a-c)** Hierarchical clustering analysis was performed on 9953 cells either using (a) the gene expression analysis or (b) only considering the detection of ADTs. Results were projected in a 2D space using t-SNE. Each colour represents a specific cluster. In (c) t-SNE distribution of the ADT clustering is

shown using the cluster colouring of the RNA analysis. **(d)** Cells were annotated based on transcriptional similarity to reference datasets derived from the Immunological Genome Project (ImmGen). Each colour represents a specific subset as defined in the reference dataset. **(e)** T-SNE plots illustrating the scaled expression of EpCAM1, CD31, and Podoplanin across ADT clusters. **(f)** Violin plots depicting the abundance of CD80 ADTs across ADT TEC clusters. The box was drawn from the 25th percentile (Q1) to the 75th percentile (Q3) of the ADT abundance in cells from a specific cluster with the horizontal line denoting the median value. The difference Q3-Q1 forms the interquartile range (IQR). Whiskers are drawn up to the largest data point and down to the smallest data point falling within the range  $1.5 \times \text{IQR}$ . All other observed data points outside the boundary of the whiskers are plotted individually as outliers. **(g)** Bar graphs illustrating the distribution of 1- and 16-week-old derived TEC across ADT (left panel) and RNA (right panel) clusters. Each colour represents a specific cluster. **(h,i)** T-SNE plots illustrating the scaled expression of the gene expression of (h) perinatal cTEC markers such as *Cd83*, *Cd40*, *Tnfrsf14*, *Foxn1*, *Itga1*, and *Nt5e*, and of (i) tuft-like and intertypical TEC markers such as *Ly6a/Ly6e*, *Cd63*, *Kit*, and *Aire* across ADT clusters.

## Supplementary Figure 7

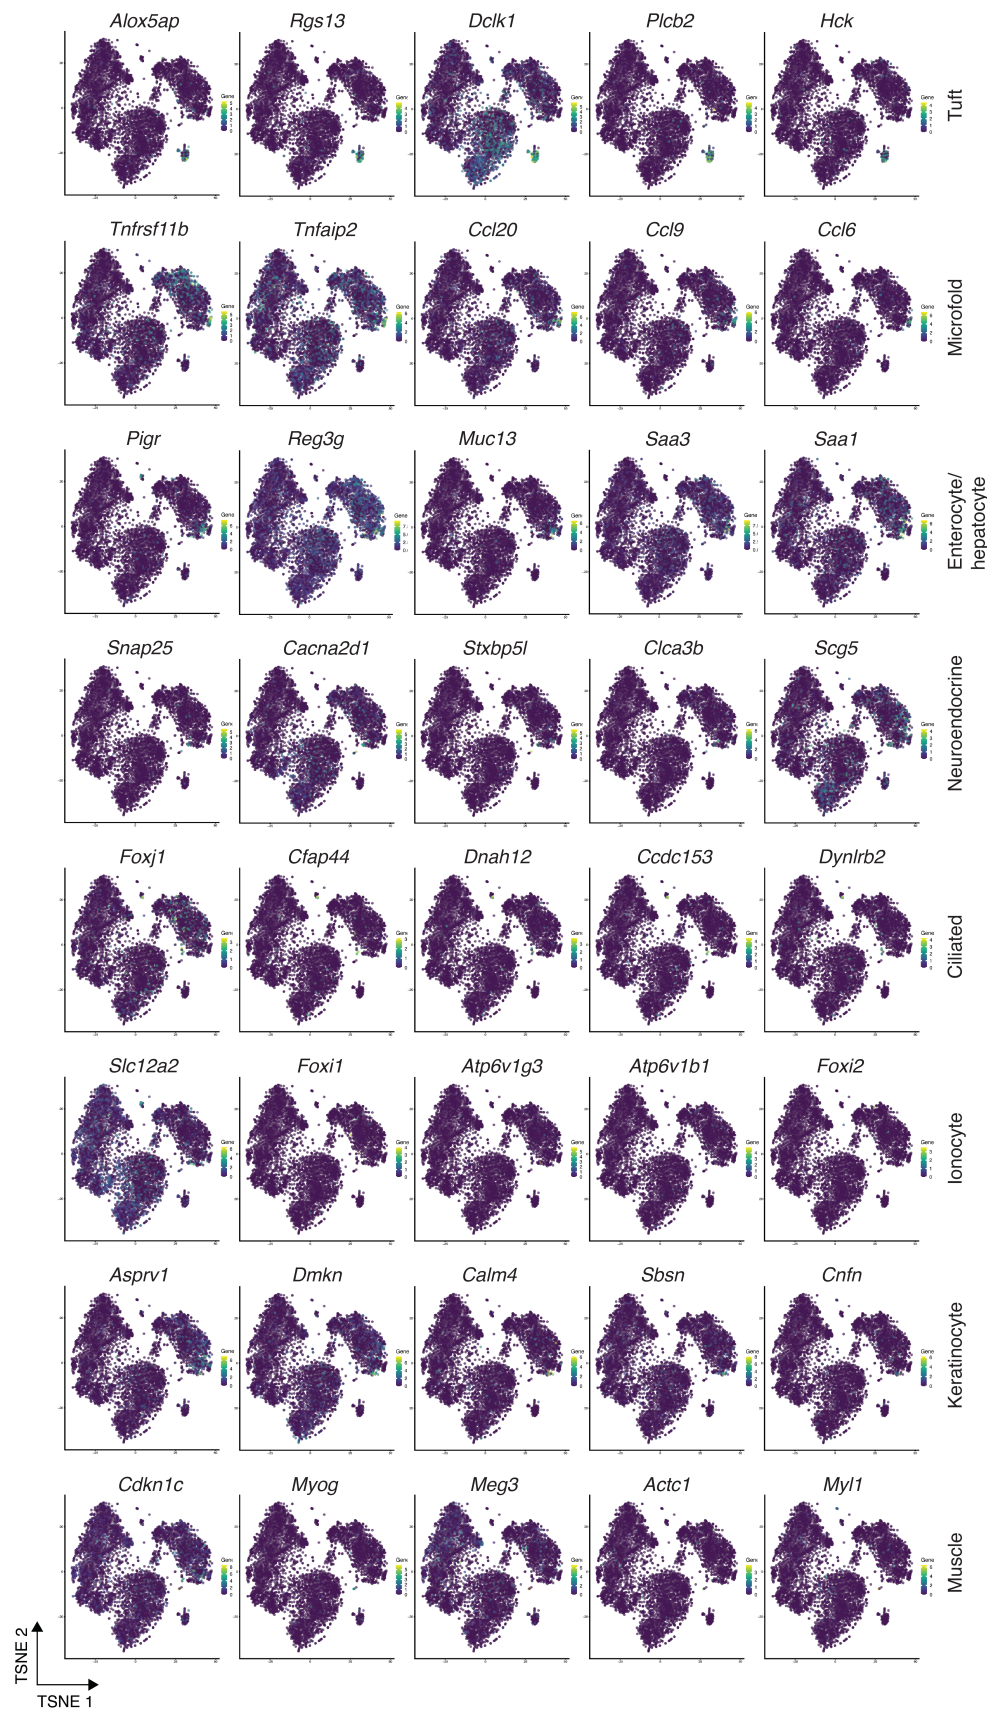

### Supplementary Figure 7 | Gene signature of “mimetic” mTEC subsets

CD45<sup>+</sup>Ter119<sup>-</sup> thymic stromal cells isolated from 1- and 16-week-old C57BL/6 WT mice were used for scRNAseq in combination with CITEseq as described in the methods. Shown are t-SNE plots illustrating the scaled expression of the top genes described to identify the corresponding mimetic mTEC subsets<sup>2</sup>.

## Supplementary Figure 8

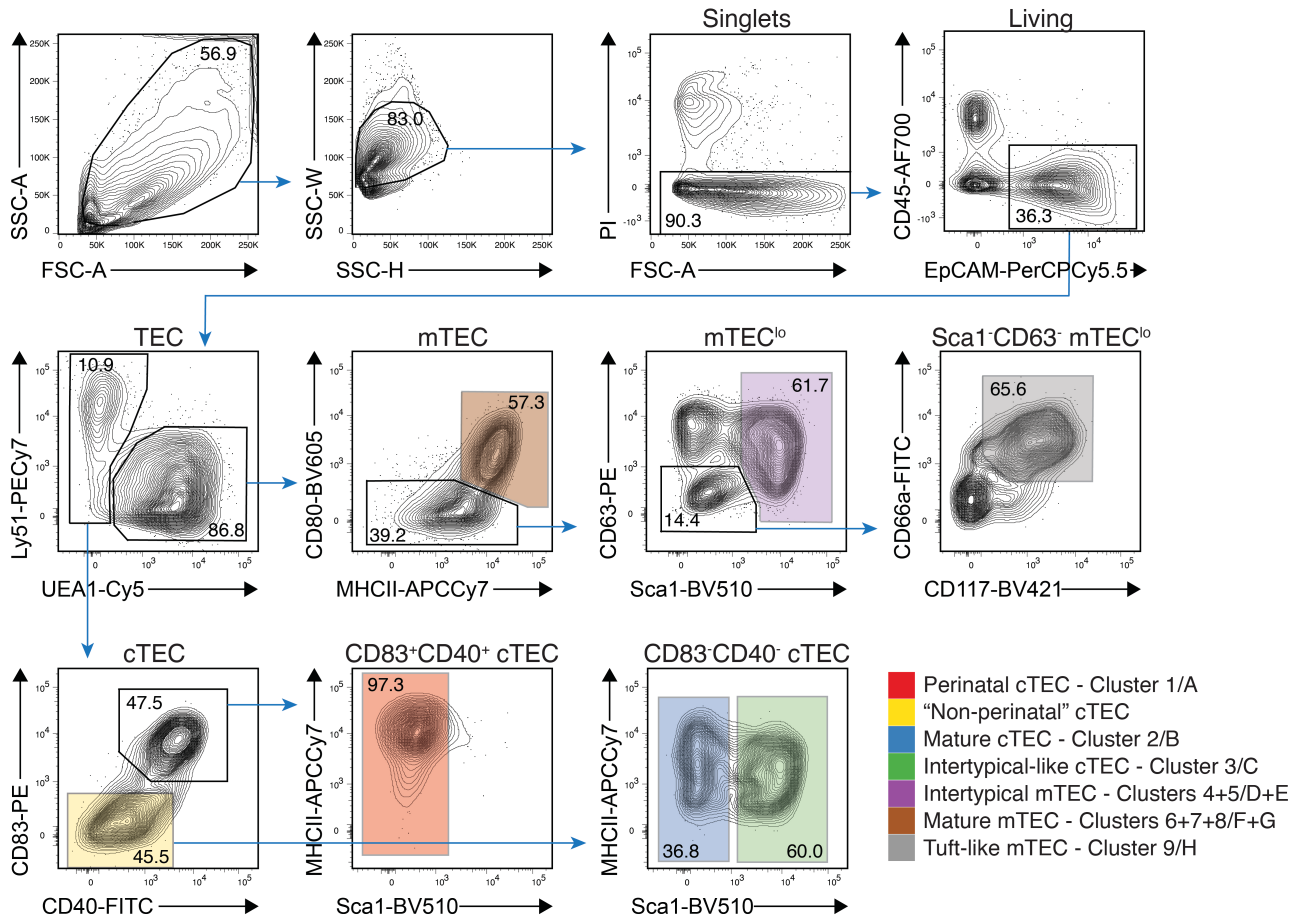

### Supplementary Figure 8 | Gating strategy to identify TEC subpopulations

Shown are representative FACS plots illustrating the new gating strategy to identify TEC subpopulations based on the surface expression profiles obtained from CITEseq. Colours represent different TEC subpopulations and CITEseq clusters as indicated. Data are derived from a 4-week-old C57BL/6 WT mouse and is representative of 3 independent experiments.

## Supplementary Figure 9

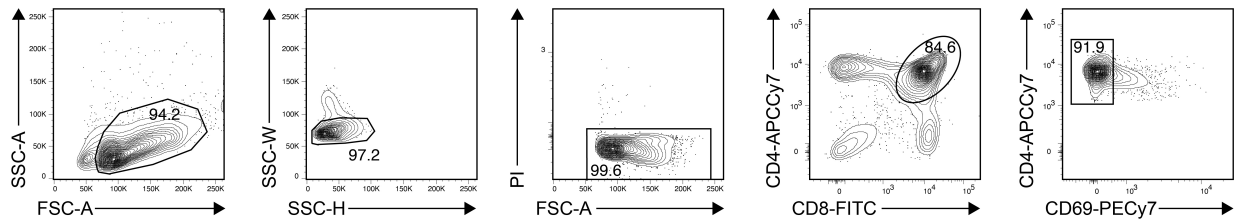

### Supplementary Figure 9 | Gating strategy to identify DP thymocytes

Shown are representative FACS plots illustrating the gating strategy to identify CD69<sup>-</sup> DP thymocytes. Data are derived from a 4-week-old C57BL/6 WT mouse.

## Supplementary Figure 10

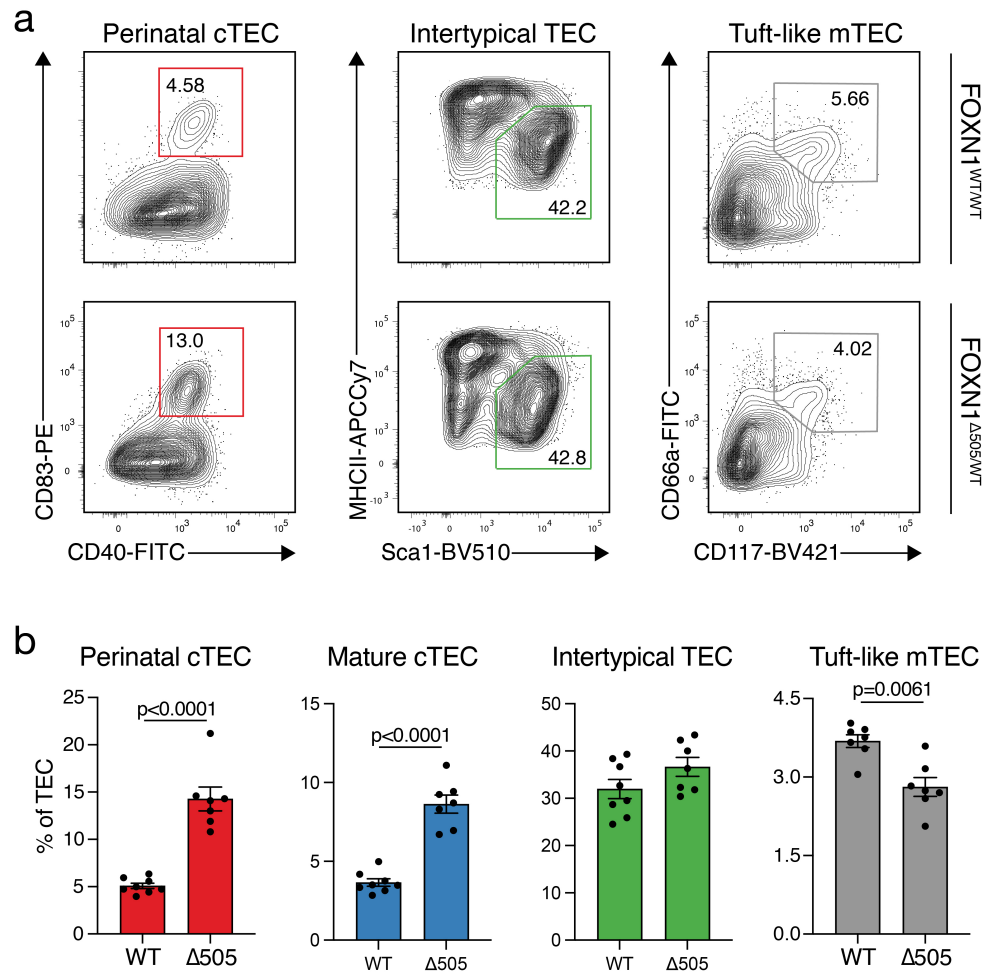

### Supplementary Figure 10 | Application of new TEC markers on FOXN1<sup>Δ505/WT</sup> mice

(a,b) FOXN1<sup>Δ505/WT</sup> mice were analysed for the abundance of perinatal cTEC, mature cTEC, intertypical TEC and tuft-like mTEC using the new markers and compared to C57BL/6 WT mice at an age of 4-weeks. Shown are (a) representative FACS plots and (b) cumulative data (WT n = 8 (perinatal cTEC, mature cTEC, intertypical TEC) or n = 7 (tuft-like mTEC), Δ505 n = 7, from three independent experiments). Data are presented as mean values  $\pm$  SEM. Statistical analysis was done with two-tailed unpaired Student's t-test.

**Supplementary Table 1**

| <b>Exploratory markers</b> | <b>Isotype</b> | <b>Expression in thymic stromal compartment</b> |
|----------------------------|----------------|-------------------------------------------------|
| Blank                      | Blank          | No                                              |
| AHIgG                      | AHIgG          | No                                              |
| CD3e                       | AHIgG          | Yes                                             |
| CD80                       | AHIgG          | Yes                                             |
| CD154                      | AHIgG          | No                                              |
| Notch 1                    | AHIgG          | No                                              |
| CD30                       | AHIgG          | No                                              |
| CD178                      | AHIgG          | No                                              |
| CD103                      | AHIgG          | No                                              |
| Delta-like 4               | AHIgG          | No                                              |
| CD195                      | AHIgG          | No                                              |
| Notch 4                    | AHIgG          | No                                              |
| CD229 (Ly-9)               | AHIgG          | No                                              |
| CD69                       | AHIgG          | No                                              |
| Notch 3                    | AHIgG          | No                                              |
| JAML                       | AHIgG          | No                                              |
| Notch 2                    | AHIgG          | No                                              |
| CD194                      | AHIgG          | No                                              |
| CD152                      | AHIgG          | No                                              |
| CD120a                     | AHIgG          | Yes                                             |
| CD11c                      | AHIgG          | No                                              |
| Delta-like 1               | AHIgG          | No                                              |
| CD196                      | AHIgG          | No                                              |
| CD29                       | AHIgG          | Yes                                             |
| CD55                       | AHIgG          | Yes                                             |
| Jagged 2                   | AHIgG          | No                                              |
| CD79b                      | AHIgG          | No                                              |
| IFN-g R b chain            | AHIgG          | Yes                                             |
| CD61                       | AHIgG          | Yes                                             |
| CD121a                     | AHIgG          | Yes                                             |
| TCR b chain                | AHIgG          | Yes                                             |
| FceRIa                     | AHIgG          | No                                              |
| CD16.2                     | AHIgG          | No                                              |
| CD36                       | AHIgG          | Yes                                             |
| DcTRAIL-R1                 | AHIgG          | Yes                                             |
| CD84                       | AHIgG          | No                                              |
| CD48                       | AHIgG          | Yes                                             |
| CD49b                      | AHIgG          | Yes                                             |
| CD120b                     | AHIgG          | No                                              |
| CD183                      | AHIgG          | No                                              |
| CD262                      | AHIgG          | Yes                                             |
| HVEM                       | AHIgG          | Yes                                             |
| TCR Vg1.1 + Vg1.2          | AHIgG          | No                                              |
| B7-H4                      | AHIgG          | No                                              |
| CD339                      | AHIgG          | No                                              |
| CD49a                      | AHIgG          | Yes                                             |
| PD-1H                      | AHIgG          | No                                              |
| CD85k                      | AHIgG          | No                                              |
| Plexin B2                  | AHIgG          | Yes                                             |
| CD27                       | AHIgG          | No                                              |
| DR3                        | AHIgG          | No                                              |
| TCR g/d                    | AHIgG          | No                                              |
| mIgG2ak                    | mIgG2ak        | No                                              |
| CD45.1                     | mIgG2ak        | No                                              |
| CD45.2                     | mIgG2ak        | No                                              |
| NK-1.1                     | mIgG2ak        | No                                              |
| Ly108                      | mIgG2ak        | No                                              |

|                         |         |     |
|-------------------------|---------|-----|
| CD207                   | mIgG2ak | No  |
| CX3CR1                  | mIgG2ak | Yes |
| mIgG1k                  | mIgG1k  | No  |
| CD66a                   | mIgG1k  | Yes |
| IFNAR-1                 | mIgG1k  | No  |
| Tim-2                   | mIgG1k  | No  |
| CD272                   | mIgG1k  | No  |
| CD64                    | mIgG1k  | Yes |
| CD351                   | mIgG1k  | No  |
| LAP                     | mIgG1k  | No  |
| TIGIT                   | mIgG1k  | No  |
| Trem-like 4             | mIgG1k  | No  |
| CD59a                   | mIgG1k  | Yes |
| Ly49H                   | mIgG1k  | No  |
| CD90.1                  | mIgG1k  | No  |
| mIgG2bk                 | mIgG2bk | No  |
| CD157                   | mIgG2bk | Yes |
| CD159a                  | mIgG2bk | Yes |
| XCR1                    | mIgG2bk | No  |
| mIgMk                   | mIgMk   | No  |
| SSEA-1                  | mIgMk   | Yes |
| rIgG1k                  | rIgG1k  | No  |
| Ig light chain          | rIgG1k  | No  |
| Siglec H                | rIgG1k  | No  |
| CD255                   | rIgG1k  | No  |
| CD202b                  | rIgG1k  | Yes |
| GITR Ligand             | rIgG1k  | No  |
| CD147                   | rIgG1k  | Yes |
| CD73                    | rIgG1k  | Yes |
| CD51                    | rIgG1k  | Yes |
| NKG2D                   | rIgG1k  | No  |
| CD96                    | rIgG1k  | No  |
| Integrin b7             | rIgG1k  | No  |
| CD210                   | rIgG1k  | No  |
| CD83                    | rIgG1k  | Yes |
| Mac-3                   | rIgG1k  | Yes |
| CD223                   | rIgG1k  | No  |
| CD134                   | rIgG1k  | No  |
| Blank                   | Blank   | No  |
| CD41                    | rIgG1k  | No  |
| CD268                   | rIgG1k  | No  |
| CD144                   | rIgG1k  | No  |
| CD370                   | rIgG1k  | No  |
| CD369 (Dectin-1,CLEC7A) | rIgG1k  | No  |
| PIR-A/B                 | rIgG1k  | No  |
| CD22                    | rIgG1k  | No  |
| E-Cadherin              | rIgG1k  | Yes |
| CD172a (SIRPa)          | rIgG1k  | Yes |
| CD319                   | rIgG1k  | Yes |
| rIgG2a                  | rIgG2a  | No  |
| MAIR-V                  | rIgG2a  | No  |
| CD146                   | rIgG2a  | Yes |
| VISTA                   | rIgG2a  | Yes |
| CD8a                    | rIgG2a  | Yes |
| CD275                   | rIgG2a  | No  |
| CD34                    | rIgG2a  | Yes |
| Ly-6A/E                 | rIgG2a  | Yes |
| CD40                    | rIgG2a  | Yes |
| CD45R/B220              | rIgG2a  | No  |
| CD197                   | rIgG2a  | No  |

|                          |        |     |
|--------------------------|--------|-----|
| CD47                     | rIgG2a | Yes |
| CD98                     | rIgG2a | Yes |
| CD14                     | rIgG2a | Yes |
| CD107a (LAMP-1)          | rIgG2a | Yes |
| CD18                     | rIgG2a | Yes |
| Ly-6G                    | rIgG2a | Yes |
| CD21/35                  | rIgG2a | No  |
| Mac-2                    | rIgG2a | No  |
| CD199                    | rIgG2a | No  |
| Ly-51                    | rIgG2a | Yes |
| IgD                      | rIgG2a | No  |
| Tim-4                    | rIgG2a | No  |
| CD71                     | rIgG2a | Yes |
| H-2                      | rIgG2a | Yes |
| CD45RB                   | rIgG2a | Yes |
| CD326                    | rIgG2a | Yes |
| IgM                      | rIgG2a | No  |
| CD155                    | rIgG2a | Yes |
| CD200R                   | rIgG2a | No  |
| CD254                    | rIgG2a | No  |
| IL-21R                   | rIgG2a | No  |
| CD276                    | rIgG2a | No  |
| CD9                      | rIgG2a | Yes |
| CD105                    | rIgG2a | Yes |
| CD366                    | rIgG2a | No  |
| 4-1BB Ligand             | rIgG2a | No  |
| CD265                    | rIgG2a | No  |
| TLR4 (CD284)/MD2 Complex | rIgG2a | Yes |
| CD19                     | rIgG2a | No  |
| LPAM-1                   | rIgG2a | No  |
| CD62L                    | rIgG2a | No  |
| CD23                     | rIgG2a | No  |
| CD5                      | rIgG2a | Yes |
| CD273                    | rIgG2a | Yes |
| CD31                     | rIgG2a | Yes |
| F4/80                    | rIgG2a | No  |
| CD94                     | rIgG2a | No  |
| CD267                    | rIgG2a | No  |
| Ly-49A                   | rIgG2a | No  |
| CD180                    | rIgG2a | Yes |
| CD11a                    | rIgG2a | Yes |
| LT beta R                | rIgG2a | Yes |
| CD122                    | rIgG2a | No  |
| CD106                    | rIgG2a | Yes |
| CD365                    | rIgG2a | No  |
| CD115                    | rIgG2a | No  |
| CD140a                   | rIgG2a | Yes |
| PDC-TREM                 | rIgG2a | No  |
| CD135                    | rIgG2a | No  |
| CD127                    | rIgG2a | No  |
| CD140b                   | rIgG2a | Yes |
| ESAM                     | rIgG2a | Yes |
| CD200                    | rIgG2a | Yes |
| CD309                    | rIgG2a | No  |
| TLT-2                    | rIgG2a | No  |
| CD253                    | rIgG2a | No  |
| CD335                    | rIgG2a | No  |
| CD205                    | rIgG2a | Yes |
| Galectin-9               | rIgG2a | Yes |
| CD200R3                  | rIgG2a | No  |

|             |         |     |
|-------------|---------|-----|
| MAIR-IV     | rIgG2a  | No  |
| Ly49D       | rIgG2a  | No  |
| CD123       | rIgG2a  | No  |
| CD355       | rIgG2a  | No  |
| CD169       | rIgG2a  | No  |
| CD138       | rIgG2a  | No  |
| CD160       | rIgG2a  | No  |
| CD39        | rIgG2a  | Yes |
| GARP        | rIgG2a  | No  |
| CD179a      | rIgG2a  | No  |
| CD371       | rIgG2a  | No  |
| CD63        | rIgG2a  | Yes |
| CD49e       | rIgG2a  | No  |
| CD193       | rIgG2a  | No  |
| RbIgG       | RbIgG   | No  |
| CD300LG     | rIgG2a  | Yes |
| CD301a      | rIgG2a  | No  |
| IL-33Ra     | rIgG2a  | No  |
| CD304       | rIgG2a  | No  |
| CD6         | rIgG2a  | No  |
| CD100       | rIgG2a  | No  |
| CD104       | rIgG2a  | Yes |
| CD182       | rIgG2a  | Yes |
| MAdCAM-1    | rIgG2a  | Yes |
| MERTK (Mer) | rIgG2a  | Yes |
| CD226       | rIgG2a  | No  |
| Ly6K        | rIgG2a  | Yes |
| CD16/32     | rIgG2a  | Yes |
| CD150       | rIgG2a  | Yes |
| CD25        | rIgG2a  | Yes |
| CD38        | rIgG2a  | Yes |
| CD133       | rIgG2a  | Yes |
| CD301b      | rIgG2a  | No  |
| CD34        | rIgG2a  | Yes |
| rIgG2bk     | rIgG2bk | No  |
| CD43        | rIgG2bk | Yes |
| FR4         | rIgG2bk | No  |
| CD1d        | rIgG2bk | Yes |
| CD70        | rIgG2bk | Yes |
| CD4         | rIgG2bk | Yes |
| I-A/I-E     | rIgG2bk | Yes |
| CD153       | rIgG2bk | No  |
| CD54        | rIgG2bk | Yes |
| 33D1        | rIgG2bk | No  |
| CD90.2      | rIgG2bk | Yes |
| TER-119     | rIgG2bk | No  |
| CD49d       | rIgG2bk | Yes |
| CD24        | rIgG2bk | Yes |
| Ly-6G/Ly-6C | rIgG2bk | Yes |
| CD86        | rIgG2bk | Yes |
| CD11b       | rIgG2bk | Yes |
| CD45        | rIgG2bk | Yes |
| CD279       | rIgG2bk | No  |
| RAE-1g      | rIgG2bk | No  |
| CD8b        | rIgG2bk | Yes |
| CD44        | rIgG2bk | Yes |
| CD126       | rIgG2bk | No  |
| CD317       | rIgG2bk | Yes |
| CD132       | rIgG2bk | Yes |
| CD3         | rIgG2bk | Yes |

|               |         |     |
|---------------|---------|-----|
| CD274         | rIgG2bk | Yes |
| CD117         | rIgG2bk | Yes |
| CD93          | rIgG2bk | No  |
| CD252         | rIgG2bk | No  |
| MD-1          | rIgG2bk | No  |
| CD357         | rIgG2bk | Yes |
| CD185         | rIgG2bk | No  |
| CD300c/d      | rIgG2bk | No  |
| CD186 (CXCR6) | rIgG2bk | No  |
| CD130         | rIgG2bk | Yes |
| CD198         | rIgG2bk | No  |
| CD20          | rIgG2bk | No  |
| CD124         | rIgG2bk | Yes |
| IL-23R        | rIgG2bk | No  |
| CD184         | rIgG2bk | Yes |
| CD2           | rIgG2bk | No  |
| rIgG2ck       | rIgG2ck | No  |
| Ly-6C         | rIgG2ck | Yes |
| Ly-6D         | rIgG2ck | Yes |
| rIgMk         | rIgMk   | No  |
| CD49b         | rIgMk   | Yes |
| GL7           | rIgMk   | Yes |
| SHIgG         | SHIgG   | No  |
| CD28          | SHIgG   | No  |
| Podoplanin    | SHIgG   | Yes |
| CD137         | SHIgG   | No  |
| CD278         | SHIgG   | No  |
| KLRG1         | SHIgG   | No  |
| Ly-49C/F/I/H  | SHIgG   | No  |
| CD177         | RbIgG   | No  |
| F3            | RbIgG   | Yes |
| Gp2           | rIgG2a  | Yes |
| Tspan8        | rIgG2bk | Yes |
| Foxn1         | mIgG2bk | Yes |

**Supplementary Table 1** | Infinity Flow exploratory markers, the isotype of the corresponding antibodies and the expression status on thymic stromal cells.

**Supplementary Table 2**

| <b>LEGENDScreen protein</b> | <b>Gene</b>      |
|-----------------------------|------------------|
| CD3e.XGBoost-bgc            | <i>Cd3e</i>      |
| CD80.XGBoost-bgc            | <i>Cd80</i>      |
| CD81.XGBoost-bgc            | <i>Cd81</i>      |
| CD120a.XGBoost-bgc          | <i>Tnfrsf1a</i>  |
| CD29.XGBoost-bgc            | <i>Itgb1</i>     |
| CD55.XGBoost-bgc            | <i>Cd55</i>      |
| IFN-γ R b chain.XGBoost-bgc | <i>Ifngr2</i>    |
| CD61.XGBoost-bgc            | <i>Itgb3</i>     |
| CD121a.XGBoost-bgc          | <i>Il1r1</i>     |
| TCR b chain.XGBoost-bgc     | <i>Tcrb</i>      |
| CD36.XGBoost-bgc            | <i>Cd36</i>      |
| DcTRAIL-R1.XGBoost-bgc      | <i>Tnfrsf23</i>  |
| CD48.XGBoost-bgc            | <i>Cd48</i>      |
| CD49b.XGBoost-bgc           | <i>Itga2</i>     |
| CD262.XGBoost-bgc           | <i>Tnfrsf10b</i> |
| HVEM.XGBoost-bgc            | <i>Tnfrsf14</i>  |
| CD49a.XGBoost-bgc           | <i>Itga1</i>     |
| Plexin B2.XGBoost-bgc       | <i>Plxnb2</i>    |
| CX3CR1.XGBoost-bgc          | <i>Cx3cr1</i>    |
| CD66a.XGBoost-bgc           | <i>Ceacam1</i>   |
| CD64.XGBoost-bgc            | <i>Fcgr1a</i>    |
| CD59a.XGBoost-bgc           | <i>Cd59a</i>     |
| CD157.XGBoost-bgc           | <i>Bst1</i>      |
| CD159a.XGBoost-bgc          | <i>Klrc1</i>     |
| SSEA-1.XGBoost-bgc          | <i>Fut4</i>      |
| CD202b.XGBoost-bgc          | <i>Tek</i>       |
| CD147.XGBoost-bgc           | <i>Bsg</i>       |
| CD73.XGBoost-bgc            | <i>Nt5e</i>      |
| CD51.XGBoost-bgc            | <i>Itgav</i>     |
| CD83.XGBoost-bgc            | <i>Cd83</i>      |
| Mac-3.XGBoost-bgc           | <i>Lgals3</i>    |
| E-Cadherin.XGBoost-bgc      | <i>Cdh1</i>      |
| CD172a (SIRPa).XGBoost-bgc  | <i>Sirpa</i>     |
| CD319.XGBoost-bgc           | <i>Slamf7</i>    |
| CD146.XGBoost-bgc           | <i>Mcam</i>      |
| VISTA.XGBoost-bgc           | <i>Vsir</i>      |
| CD8a.XGBoost-bgc            | <i>Cd8a</i>      |
| CD34.XGBoost-bgc            | <i>Cd34</i>      |
| Ly-6A/E.XGBoost-bgc         | <i>Ly6a</i>      |
| CD40.XGBoost-bgc            | <i>Cd40</i>      |
| CD47.XGBoost-bgc            | <i>Cd47</i>      |
| CD98.XGBoost-bgc            | <i>Slc3a2</i>    |
| CD14.XGBoost-bgc            | <i>Cd14</i>      |
| CD107a (LAMP-1).XGBoost-bgc | <i>Lamp1</i>     |
| CD18.XGBoost-bgc            | <i>Itgb2</i>     |
| Ly-6G.XGBoost-bgc           | <i>Ly6g</i>      |
| Ly-51.XGBoost-bgc           | <i>Enpep</i>     |
| CD71.XGBoost-bgc            | <i>Tfrc</i>      |
| H-2.XGBoost-bgc             |                  |
| CD45RB.XGBoost-bgc          | <i>Ptprc</i>     |
| CD326.XGBoost-bgc           | <i>Epcam</i>     |
| CD155.XGBoost-bgc           | <i>Pvr</i>       |
| CD9.XGBoost-bgc             | <i>Cd9</i>       |
| CD105.XGBoost-bgc           | <i>Eng</i>       |

|                                      |                 |
|--------------------------------------|-----------------|
| TLR4 (CD284)/MD2 Complex.XGBoost-bgc | <i>Tlr4</i>     |
| CD5.XGBoost-bgc                      | <i>Cd5</i>      |
| CD273.XGBoost-bgc                    | <i>Pdcd1lg2</i> |
| CD31.XGBoost-bgc                     | <i>Pecam1</i>   |
| CD180.XGBoost-bgc                    | <i>Cd180</i>    |
| CD11a.XGBoost-bgc                    | <i>Itgal</i>    |
| LT beta R.XGBoost-bgc                | <i>Ltbr</i>     |
| CD106.XGBoost-bgc                    | <i>Vcam1</i>    |
| CD140a.XGBoost-bgc                   | <i>Pdgfra</i>   |
| CD140b.XGBoost-bgc                   | <i>Pdgfrb</i>   |
| ESAM.XGBoost-bgc                     | <i>Esam</i>     |
| CD200.XGBoost-bgc                    | <i>Cd200</i>    |
| CD205.XGBoost-bgc                    | <i>Ly75</i>     |
| Galectin-9.XGBoost-bgc               | <i>Lgals9</i>   |
| CD39.XGBoost-bgc                     | <i>Entpd1</i>   |
| CD63.XGBoost-bgc                     | <i>Cd63</i>     |
| CD300LG.XGBoost-bgc                  | <i>Cd300lg</i>  |
| CD104.XGBoost-bgc                    | <i>Itgb4</i>    |
| CD182.XGBoost-bgc                    | <i>Cxcr2</i>    |
| MAdCAM-1.XGBoost-bgc                 | <i>Madcam1</i>  |
| MERTK (Mer).XGBoost-bgc              | <i>Merk</i>     |
| Ly6K.XGBoost-bgc                     | <i>Ly6k</i>     |
| CD16/32.XGBoost-bgc                  | <i>Fcgr3a</i>   |
| CD150.XGBoost-bgc                    | <i>Slamf1</i>   |
| CD25.XGBoost-bgc                     | <i>Il2ra</i>    |
| CD38.XGBoost-bgc                     | <i>Cd38</i>     |
| CD133.XGBoost-bgc                    | <i>Prom1</i>    |
| CD43.XGBoost-bgc                     | <i>Spn</i>      |
| CD1d.XGBoost-bgc                     | <i>Cd1d</i>     |
| CD70.XGBoost-bgc                     | <i>Cd70</i>     |
| CD4.XGBoost-bgc                      | <i>Cd4</i>      |
| I-A/I-E.XGBoost-bgc                  | <i>H2-Ab1</i>   |
| CD54.XGBoost-bgc                     | <i>Icam1</i>    |
| CD90.2.XGBoost-bgc                   | <i>Thy1</i>     |
| CD49d.XGBoost-bgc                    | <i>Itga4</i>    |
| CD24.XGBoost-bgc                     | <i>Cd24a</i>    |
| Ly-6G/Ly-6C.XGBoost-bgc              | <i>Ly6g</i>     |
| CD86.XGBoost-bgc                     | <i>Cd86</i>     |
| CD11b.XGBoost-bgc                    | <i>Itgam</i>    |
| CD45.XGBoost-bgc                     | <i>Ptprc</i>    |
| CD8b.XGBoost-bgc                     | <i>Cd8b</i>     |
| CD44.XGBoost-bgc                     | <i>Cd44</i>     |
| CD317.XGBoost-bgc                    | <i>Bst2</i>     |
| CD132.XGBoost-bgc                    | <i>Il2rg</i>    |
| CD3.XGBoost-bgc                      | <i>Cd3g</i>     |
| CD274.XGBoost-bgc                    | <i>Cd274</i>    |
| CD117.XGBoost-bgc                    | <i>Kit</i>      |
| CD357.XGBoost-bgc                    | <i>Tnfrsf18</i> |
| CD130.XGBoost-bgc                    | <i>Il6st</i>    |
| CD124.XGBoost-bgc                    | <i>Il4ra</i>    |
| CD184.XGBoost-bgc                    | <i>Cxcr4</i>    |
| Ly-6C.XGBoost-bgc                    | <i>Ly6c1</i>    |
| Ly-6D.XGBoost-bgc                    | <i>Ly6d</i>     |
| GL7.XGBoost-bgc                      | <i>Ly77</i>     |
| Podoplanin.XGBoost-bgc               | <i>Pdpn</i>     |
| F3.XGBoost-bgc                       | <i>F3</i>       |
| Gp2.XGBoost-bgc                      | <i>Gp2</i>      |

|                    |               |
|--------------------|---------------|
| Tspan8.XGBoost-bgc | <i>Tspan8</i> |
| Foxn1.XGBoost-bgc  | <i>Foxn1</i>  |
| Podoplanin         | <i>Pdpn</i>   |
| Aire               | <i>Aire</i>   |
| UEA1               | <i>Fut1</i>   |
| MHCII              | <i>H2-Ab1</i> |
| CD80               | <i>Cd80</i>   |
| CD86               | <i>Cd86</i>   |
| Sca1               | <i>Ly6a</i>   |
| CD40               | <i>Cd40</i>   |
| Ly51               | <i>Enpep</i>  |

**Supplementary Table 2** | LEGENDScreen antibody epitopes and their corresponding genes used for computational comparisons.

## References

1. Baran-Gale, J. *et al.* Ageing compromises mouse thymus function and remodels epithelial cell differentiation. *Elife* **9** (2020).
2. Michelson, D.A., Hase, K., Kaisho, T., Benoist, C. & Mathis, D. Thymic epithelial cells co-opt lineage-defining transcription factors to eliminate autoreactive T cells. *Cell* **185**, 2542-2558 e2518 (2022).
